# Supplementary material
Source: PubMed Central journal article supplement (PMC7090897)
Supplement: 12257_2018_408_MOESM1_ESM.pdf [file 12257_2018_408_MOESM1_ESM.pdf]

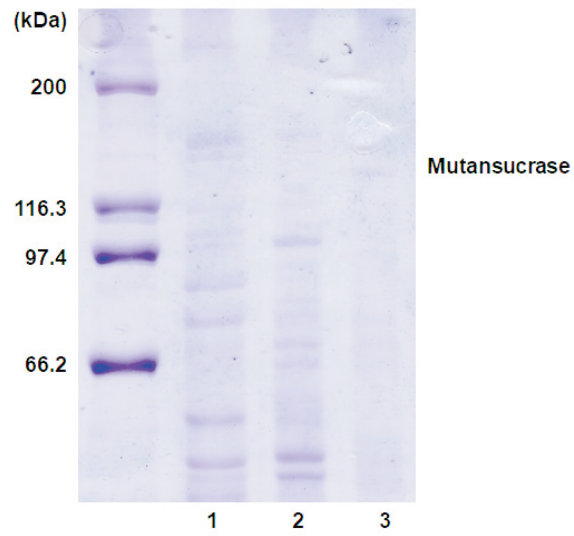

**Fig. S1.** SDS-PAGE analysis of mutansucrase purification. Lane 1: crude enzyme; Lane 2: DEAE-sepharose unbound protein; Lane 3: purified mutansucrase.

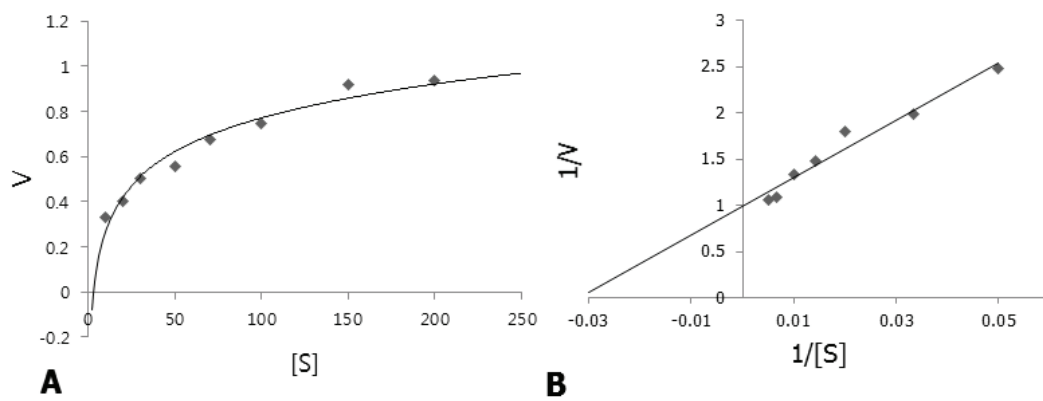

**Fig. S2.** Michaelis-Menten kinetic (A) and Lineweaver-Burk (B) plot of the purified mutansucrase.

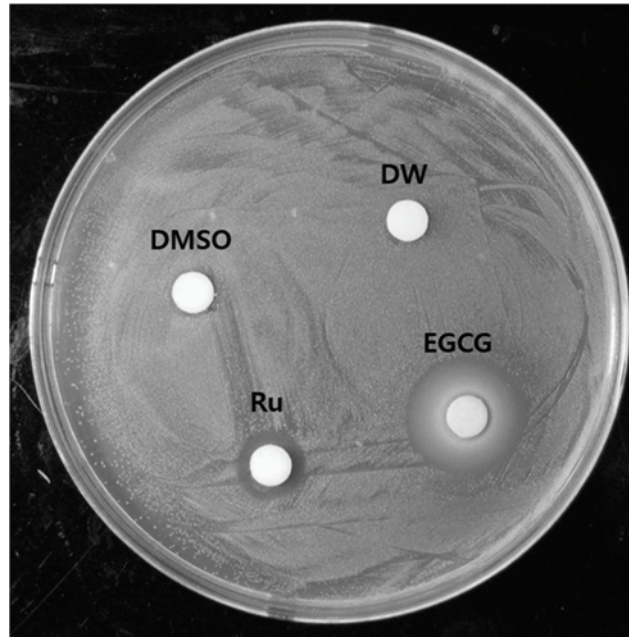

**Fig. S3.** Antimicrobial susceptibility test of Rub for *Streptococcus mutans*; DW, distilled water; DMSO, dimethyl sulfoxide; Ru, 250 mM rubusoside; EGCG, 250 mM epigallocatechin gallate (positive control).
